# Supplementary material
Source: publisher figshare collection journal article supplement (https://gsajournals.figshare.com/ndownloader/files/18315242)
Supplement: Supplementary file 1 [file 18315242]

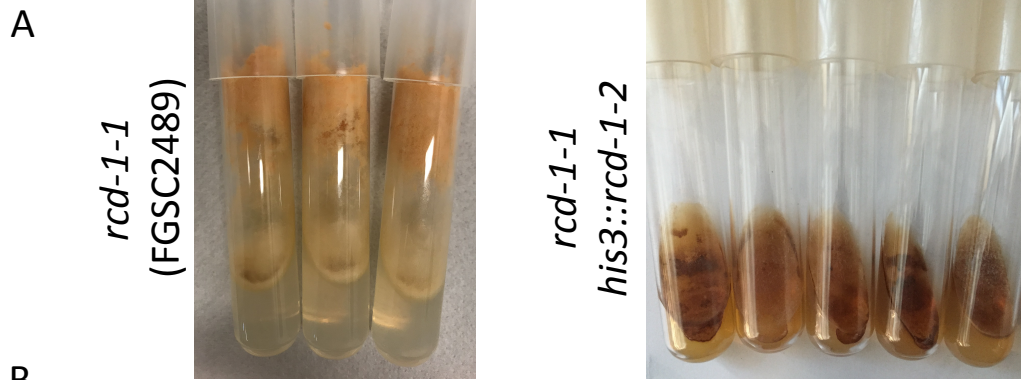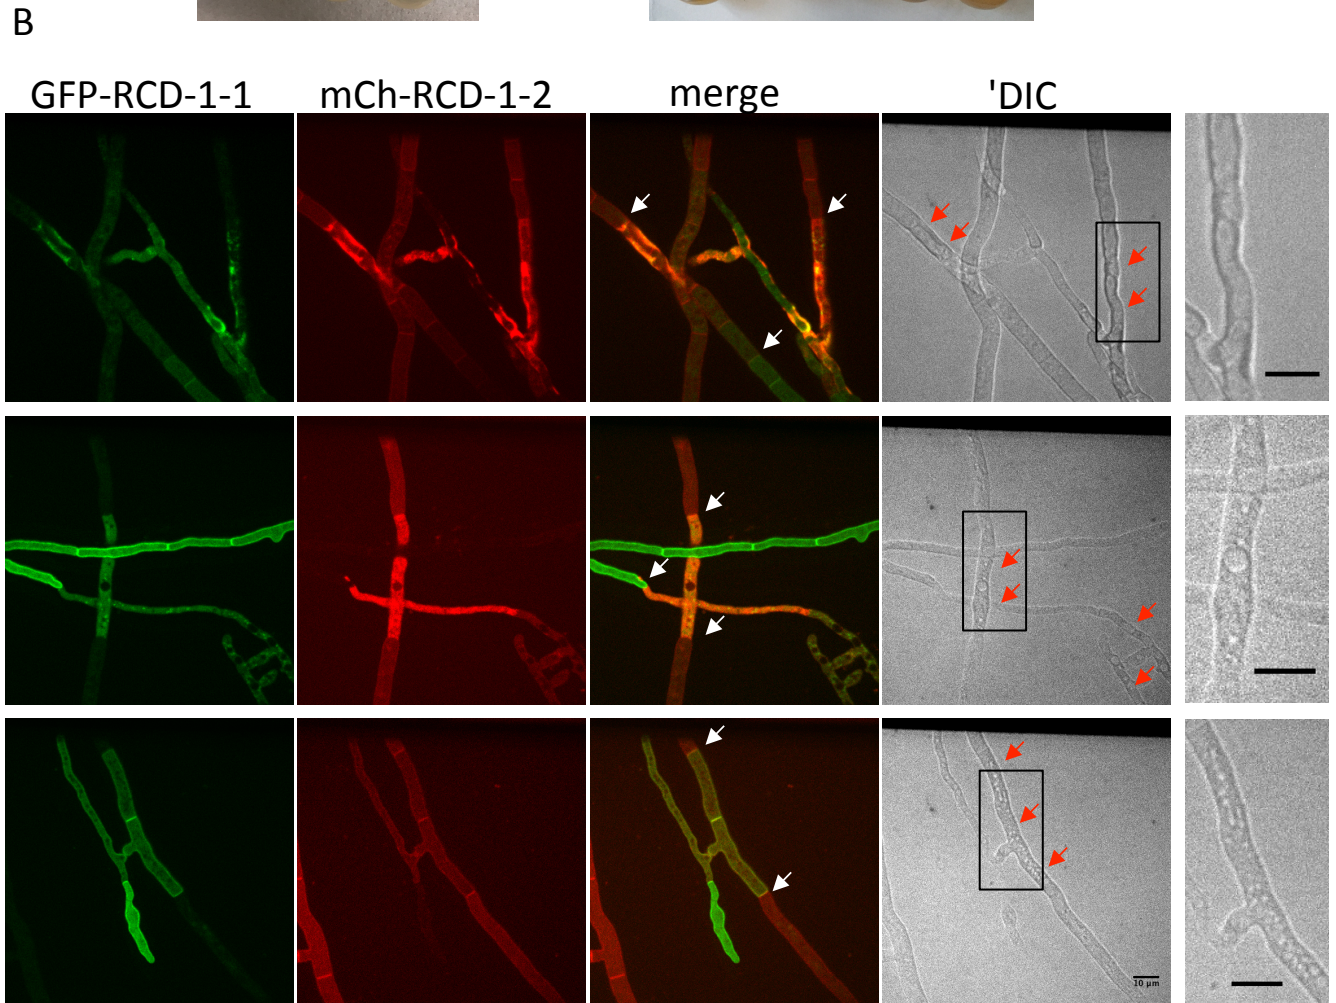

Figure S4. Heterokaryon incompatibility induced by RCD-1 allelic variants in hyphae of *N. crassa*. A. Germinating ascospores co-expressing *rcd-1-1* and *rcd-1-2* alleles show growth arrest approximately 24 hrs after germination and progressive melanization (over a period of 10 days). B. Hyphal fusion between strains expressing GFP-RCD-1-1 and mCherry-RCD-1-2 resulted in vacuolization and cellular death (red arrowheads) and cytoplasmic mixing restriction by compartmentation (white arrowheads). Black boxes indicate image crop position. Scale bars are 10  $\mu$ m.
